# Supplementary material for: The Antibacterial and Antifungal Textile Properties Functionalized by Bimetallic Nanoparticles of Ag/Cu with Different Structures
Source: Hindawi journal article supplement (doi:10.1155/2016/6056980), 2016-01-01
Supplement: f1 [file 6056980.f1.docx]

**Preparation of silver citrate:**

Sodium citrate (III), citric acid and silver carbonate provided by Sigma Aldrich and Avantor Performance Materials Poland S.A. were dissolved indemineralized water. After three days supernatant was collected in a conical flask. Then sodium hydroxide and hydrazine monohydrate provided from Sigma Aldrich was added to the above solution. The solution has changed color to brown-green with a black precipitate. The solution was filtered on the crimp filter. The resulting precipitate was washed in 6% acetic acid. The filter with precipitate was placed in a porcelain crucible and calcined. The crucible was weighted before and after calcination. The amount of pure silver was a mass difference. Silver with concentration of C = 413 ppm in 5 dm3 has been received.

**Figures:**

Figure 1S The route of washing and impregnation process.
